# Supplementary material
Source: PubMed Central journal article supplement (PMC11105759)

**Supplementary Figure 1. RNAi control data.** Example western blots of cells silenced with siRNA targeting SOD2 (A) and Nox2 (C) as compared with non-silencing control siRNAs and quantifications of dot blots spotted from the cells used in the experiments within the main text (SOD2, B; Nox2, D). Data are shown as mean and SEM, and significance is indicated by \* $p < 0.05$ .

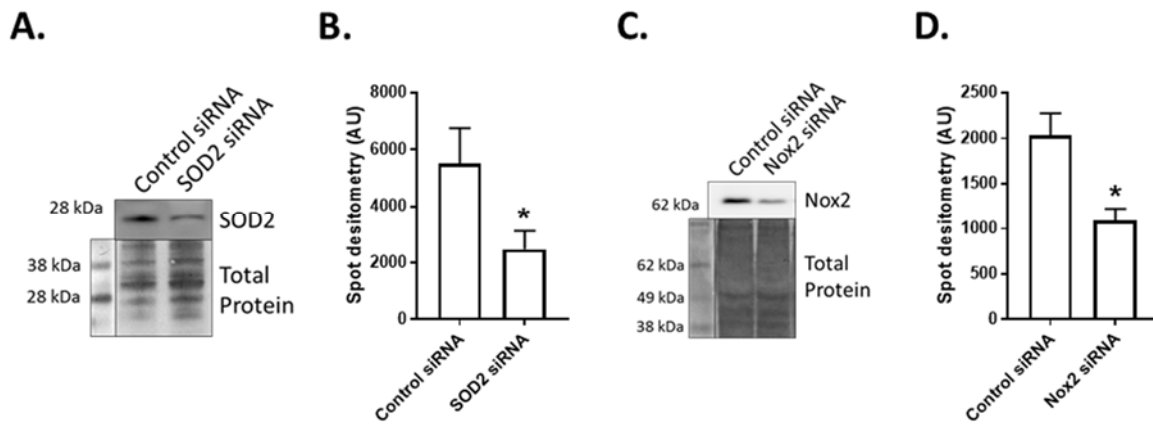

Supplement: 18_2018_2790_MOESM1_ESM.pdf [file 18_2018_2790_MOESM1_ESM.pdf]
