# Supplementary material
Source: PubMed Central journal article supplement (PMC11105759)

**Supplementary Figure 2.** Western blotting of signal protein phosphorylation. Cells treated with 1  $\mu$ M N2, or 10 nM DRP1 (Nox inhibitor) for 15 minutes were western blotted for phosphorylation of central signal transduction intermediates. **A.** Example images of blots. **B.** quantification of each phosphoprotein, total protein expression and the ratio of phospho:total protein shown as mean and SEM, n = 4.

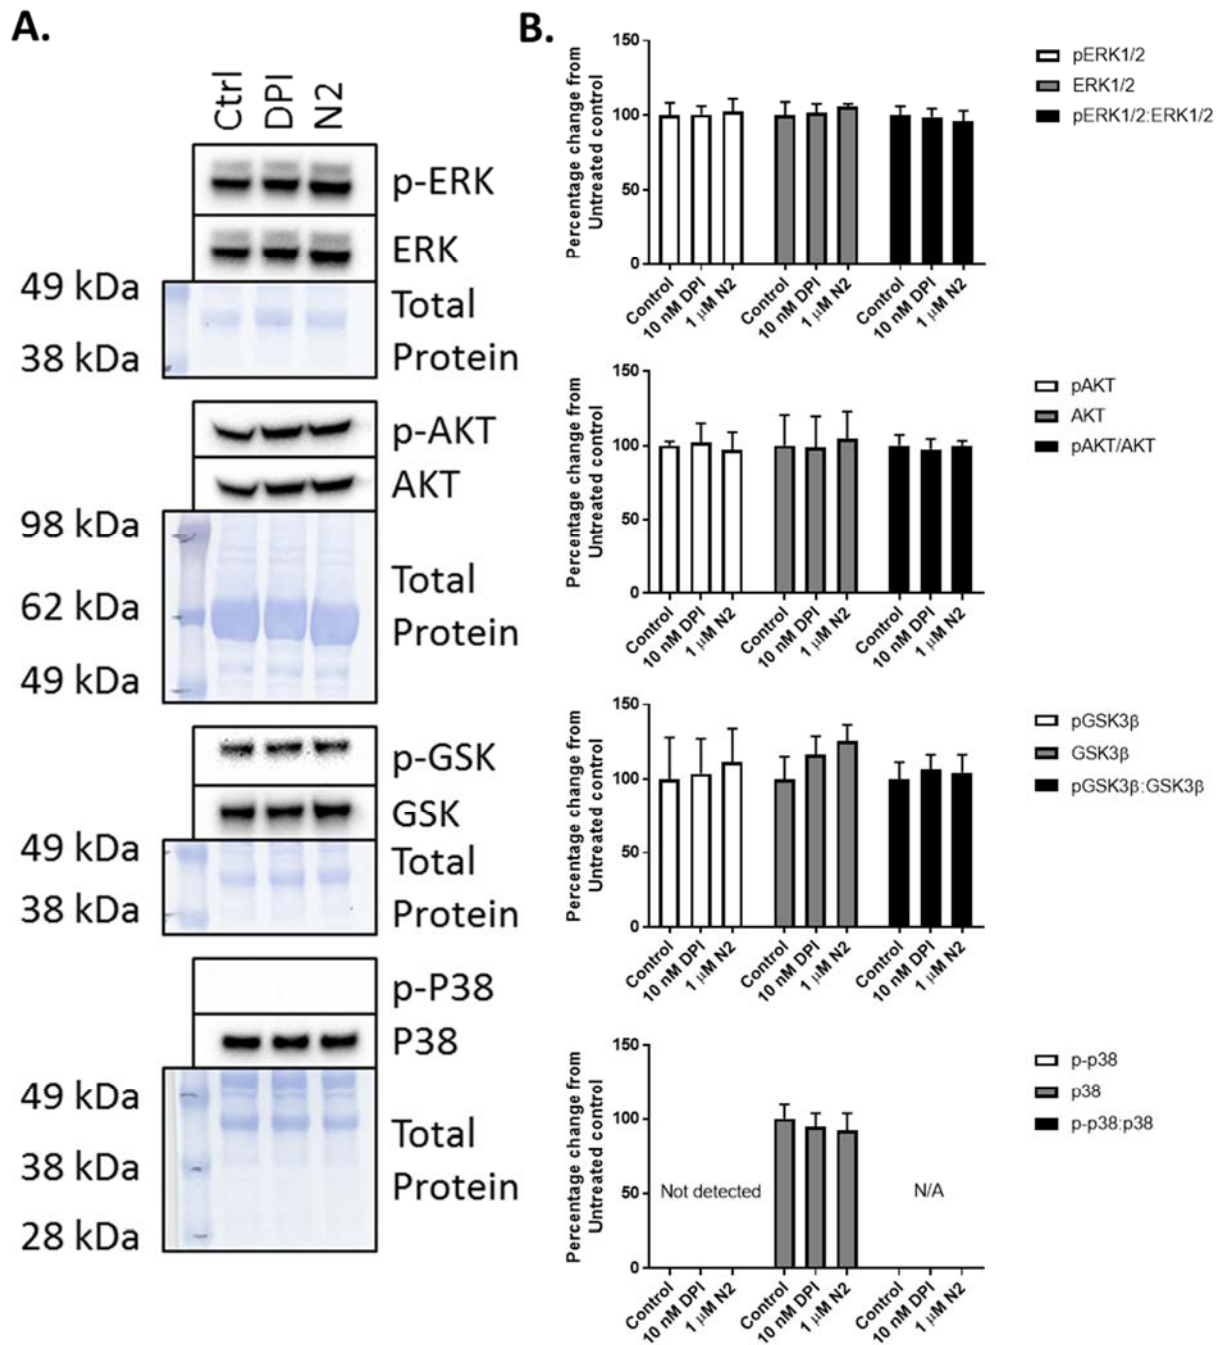

Supplement: 18_2018_2790_MOESM2_ESM.pdf [file 18_2018_2790_MOESM2_ESM.pdf]
