# Supplementary material
Source: PubMed Central journal article supplement (PMC11105759)

**Supplementary Figure 3.** Mitochondrial morphology following N1 and N2 treatment. Cells were loaded with Mitotracker Green and treated with 1  $\mu$ M N1, N2, or 10 nM DRP1 (Nox inhibitor) for 90 minutes before wide-field fluorescence imaging. Two representative images of each condition are shown. Scale bar = 15  $\mu$ m.

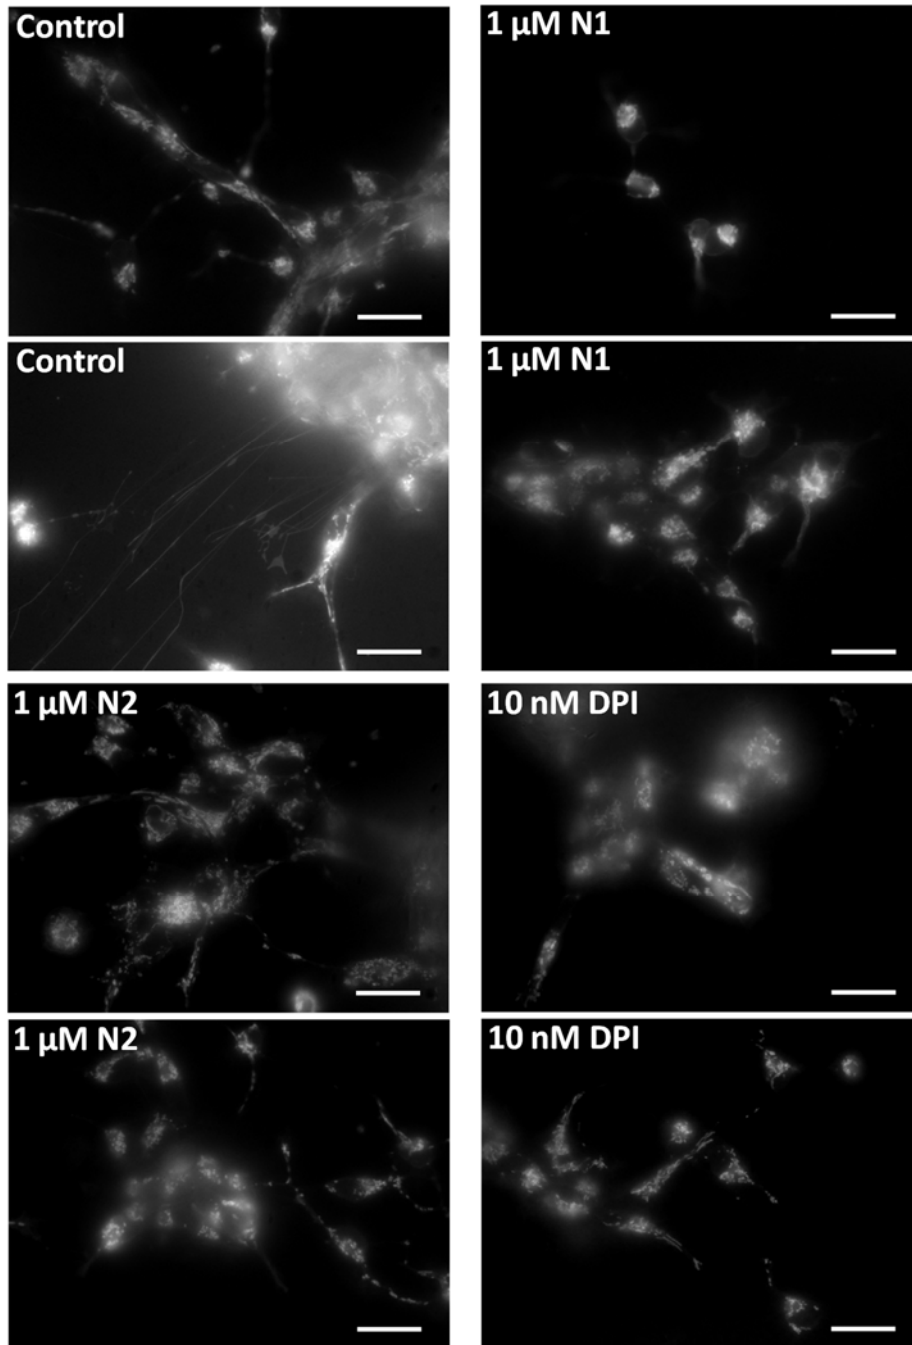

Supplement: 18_2018_2790_MOESM3_ESM.pdf [file 18_2018_2790_MOESM3_ESM.pdf]
