# Supplementary material
Source: PubMed Central journal article supplement (PMC11105759)

Supplementary Figure 4. Individual channel images comprised within the merges shown in

Figure 6A.

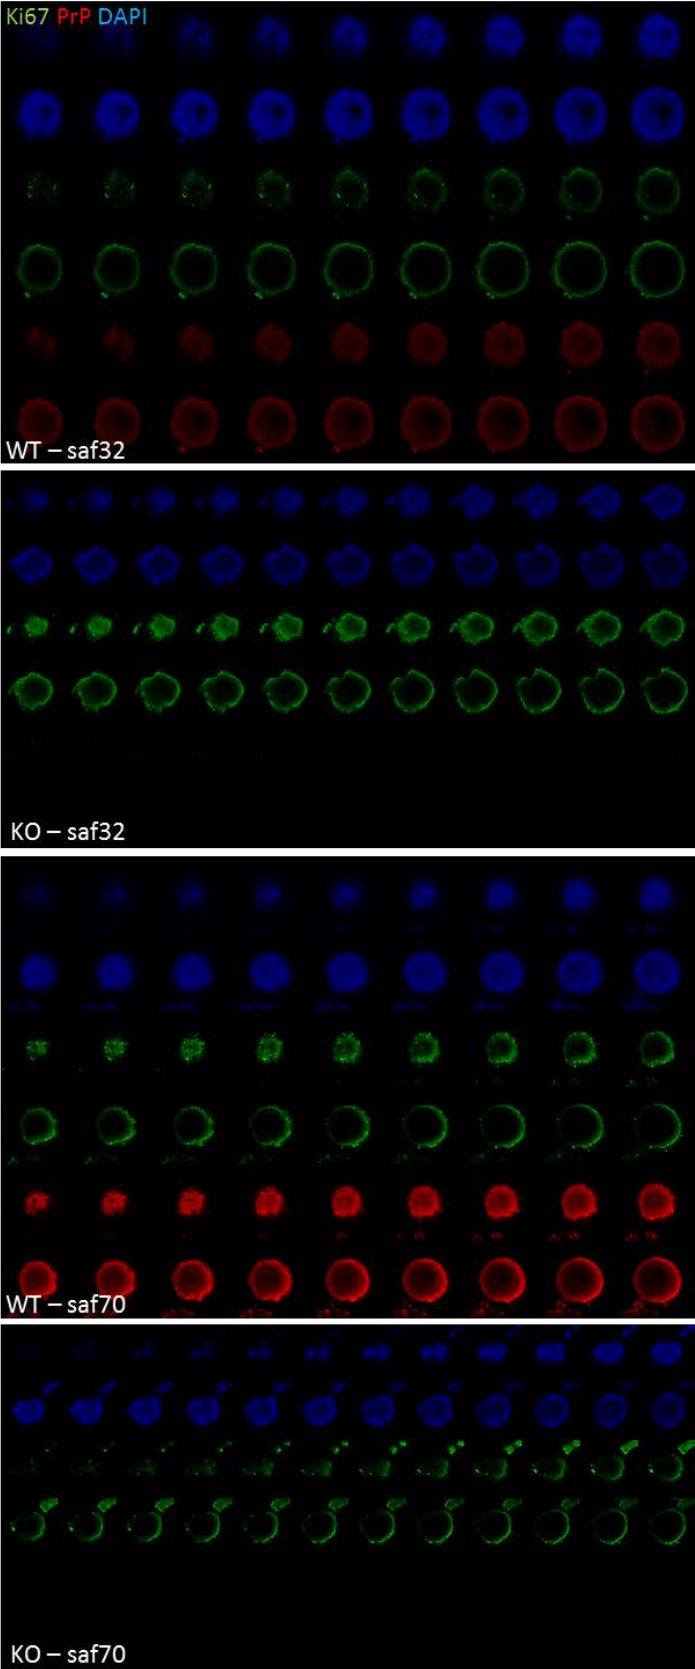

Supplement: 18_2018_2790_MOESM4_ESM.pdf [file 18_2018_2790_MOESM4_ESM.pdf]
