# Supplementary material
Source: PubMed Central journal article supplement (PMC11105759)

**Supplementary Figure 5.** *Nestin control staining of 3D neurospheres.* Neurospheres were stained with nestin, as a marker that should uniformly label them. Confocal imaging shows that antibody penetration in the 3D staining reaches the core of the neurosphere.

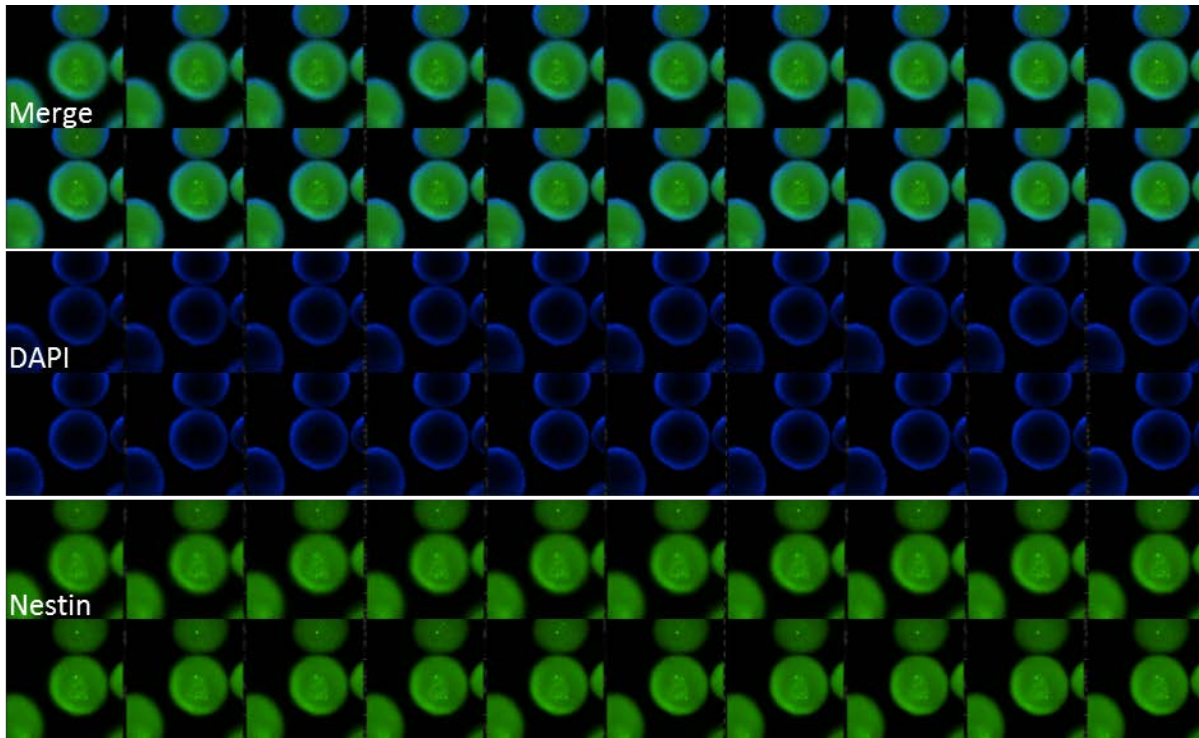

Supplement: 18_2018_2790_MOESM5_ESM.pdf [file 18_2018_2790_MOESM5_ESM.pdf]
