# Supplementary material
Source: PubMed Central journal article supplement (PMC11105759)

*Supplementary Figure 6. Higher magnification of neurosphere images shown in 6A.*

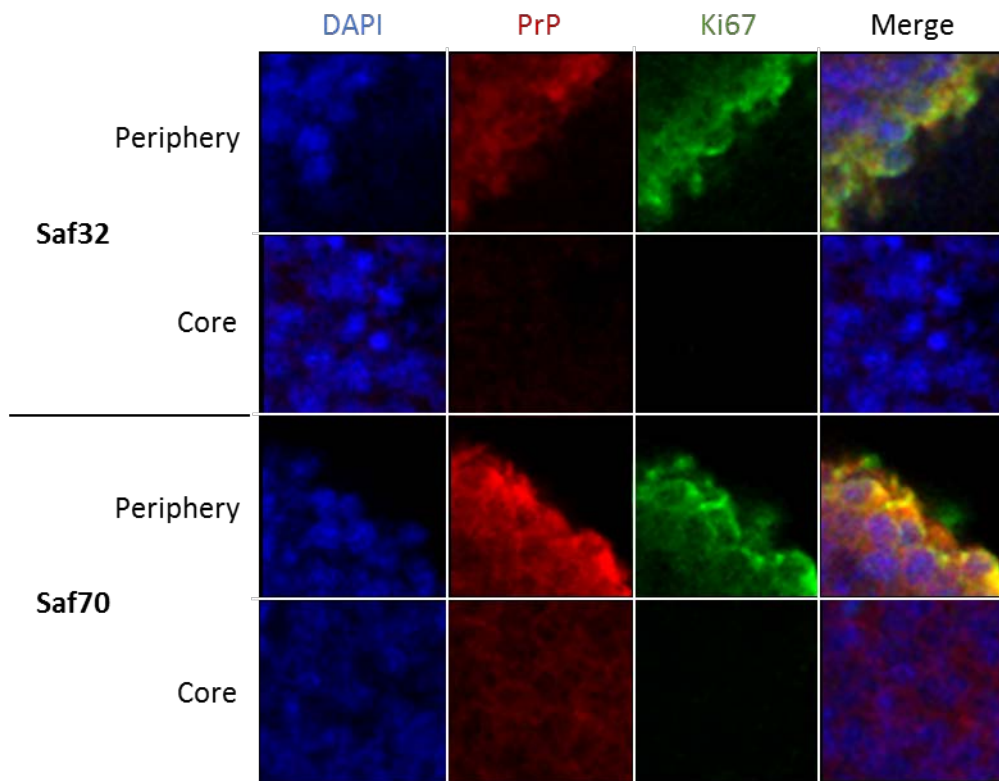

Supplement: 18_2018_2790_MOESM6_ESM.pdf [file 18_2018_2790_MOESM6_ESM.pdf]
